## Off-label combination of leadless pacemakers and subcutaneous defibrillators in bilateral venous occlusion: a new reimplantation strategy after lead extraction

A. Di Cori, S. Viani, S. Tolve, G. Zucchelli, V. Barletta, M. Giannotti Santoro, M. Parollo, T. Cellamaro, G. Branchitta, M. Carluccio, L. Segreti, L. Paperini, R. De Lucia, E. Soldati, M.G. Bongiorno

*Santa Chiara Hospital, Department of Cardiovascular Diseases, Pisa, Italy*

**Funding Acknowledgement:** Type of funding source: None

**Background:** Subcutaneous implantable cardioverter-defibrillator (S-ICD) and leadless pacemakers (LPM) provide an alternative to transvenous implantable devices. Sometimes, after transvenous (TV) lead extraction, patients show a bilateral venous occlusion, resulting not eligible for TV reimplantation.

**Purpose:** This analysis was designed to provide preliminary data on feasibility and short-term outcome of an hybrid combination (Hyb) of s-ICD plus LPM after TV-ICD explantation, in patients without anatomical transvenous reimplantation options.

**Methods:** Among 2684 consecutive extracted patients, 31 (1.1%) were reimplanted with a LPM, 66 (2.4%) with a s-ICD and 6 (0.2%) patients with an Hyb combination. Hyb strategy was considered in patients with a pacing plus defibrillating indication, and an anatomical barrier, as bilateral superior venous occlusion or massive bilateral skin erosion.

**Results:** Hyb patients were old ( $72 \pm 10$  years), with a prevalent ischemic

disease (4/6) and a reduced ejection fraction ( $43 \pm 16\%$ ). Extraction indication was infection in 4 and severe venous occlusion in 2, and included 2 single chamber, 2 dual chamber and 2 biventricular ICD. After extraction, reimplantation timing was  $7 \pm 6$  days, LPM was implanted before and sICD the day after.

LPM reimplantation indication was sinus node dysfunction in 2 and AV block in 4. Implantation duration was  $68 \pm 23$  and fluoroscopy time  $9.4 \pm 2.3$  min. ICD reimplantation indication was primary prevention in 4 and secondary prevention in 2. Implantation duration was  $118 \pm 10$  min. No complications were observed. At 1 year, no complications were observed, including device related cross-talks.

**Conclusions:** The Hyb strategy is a potential option after TV-ICD explantation in pacemaker dependent patients, when transvenous implantation is not available.

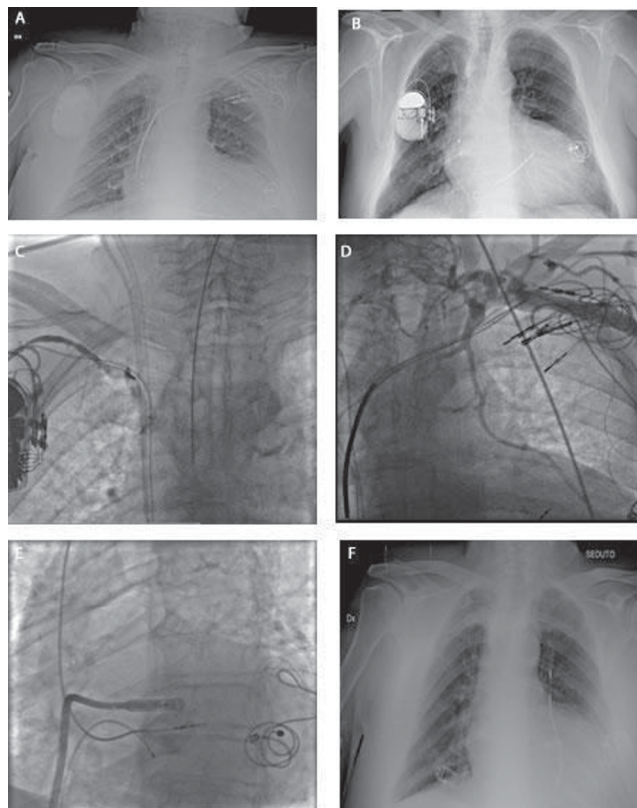

Extraction and Reimplantation Session
